# Supplementary material for: Facile synthesis of P(EDOT/Ani) : PSS with enhanced heat shielding efficiencyviatwo-stage shot growth
Source: Royal Society of Chemistry journal article supplement (doi:10.1039/c8ra01122b), 2018-01-01
Supplement: c8ra01122b1.pdf [file c8ra01122b1.pdf]

# Facile Synthesis of P(EDOT/Ani):PSS with Enhanced Heat Shielding Efficiency via Two- Stage Shot Growth

Chanil Park<sup>‡</sup>, Soeun Im<sup>‡</sup>, Wonseok Cho, Yunryeol Kim, and Jung Hyun Kim<sup>\*</sup>

*Department of Chemical and Biomolecular Engineering, Yonsei University, Yeonseo 50,  
Seodaemun-gu, Seoul 120–749, Republic of Korea*

\*E-mail: jayhkim@yonsei.ac.kr

‡These authors contributed equally to this work.

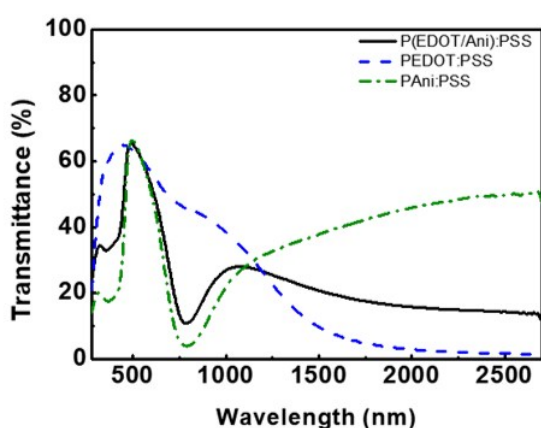

**Figure S1** UV-vis-NIR transmittance of P(EDOT/Ani):PSS film, PEDOT:PSS film, and PAni:PSS film with the same transmittance, 60% at 550 nm wavelength.

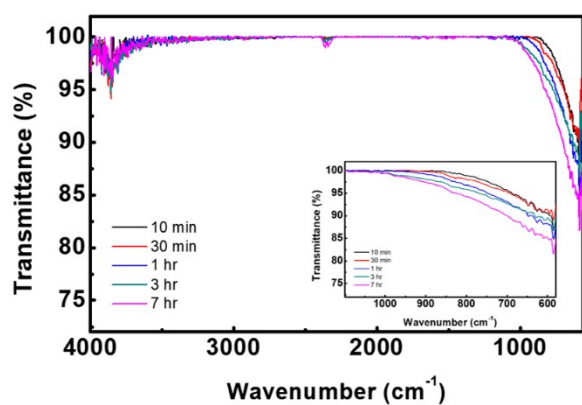

Figure S2 FT-IR spectra of P(EDOT/Ani):PSS for various time intervals of aniline monomer addition.

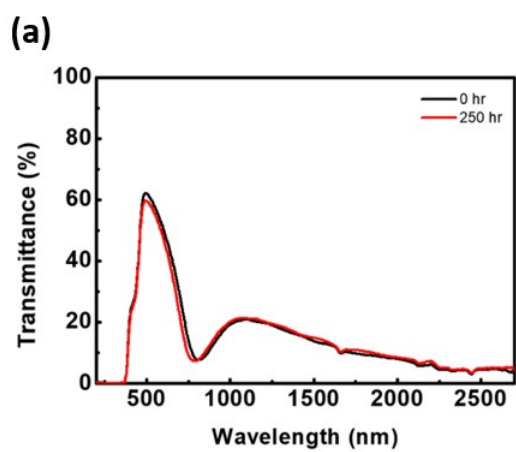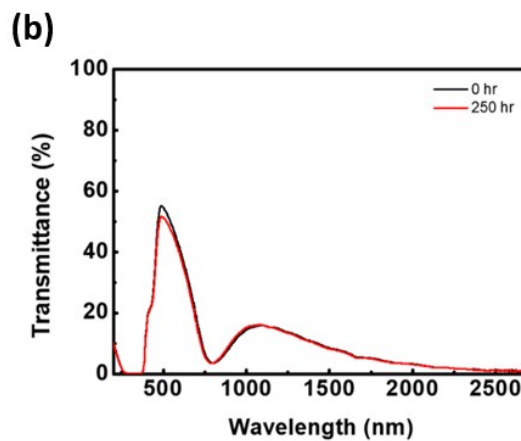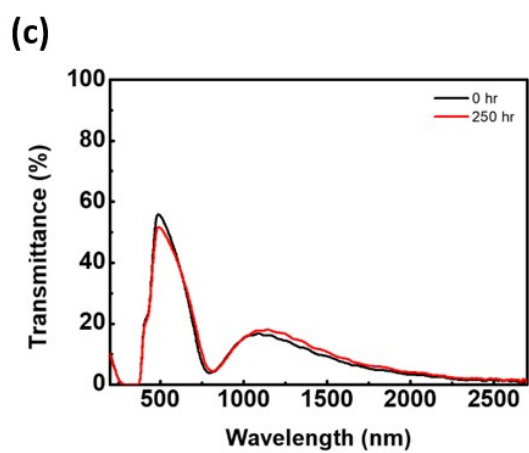

**Figure S3** Transmittance spectra variation of the P(EDOT/Ani):PSS film after durability test : (a) Ultraviolet resistance test (254 nm UV radiation for 250 h), (b) high-temperature test (85 °C) for 250 hours, (c) high-temperature and humidity test (85 °C / 85%) for 250 h.
